# Supplementary material for: Size control and shape evolution of single-twinned platinum nanocrystals in a room temperature colloidal synthesis
Source: Royal Society of Chemistry journal article supplement (doi:10.1039/c4ce01342e), 2014-09-05
Supplement: c4ce01342e1.pdf [file c4ce01342e1.pdf]

Electronic Supporting Information

## **Size control and shape evolution of single-twinned platinum nanocrystals in a room temperature colloidal synthesis**

**Milena Osmic,<sup>a</sup> Joanna Kolny-Olesiak, \*<sup>b</sup> Katharina Al-Shamery<sup>a</sup>**

<sup>a</sup> *Institute of Chemistry, University of Oldenburg, Carl-von-Ossietzky-Str. 9-11, 26129 Oldenburg, Germany*

<sup>b</sup> *Energy and Semiconductor Research Laboratory, Department of Physics, Carl von Ossietzky University of Oldenburg, 26129 Oldenburg, Germany*

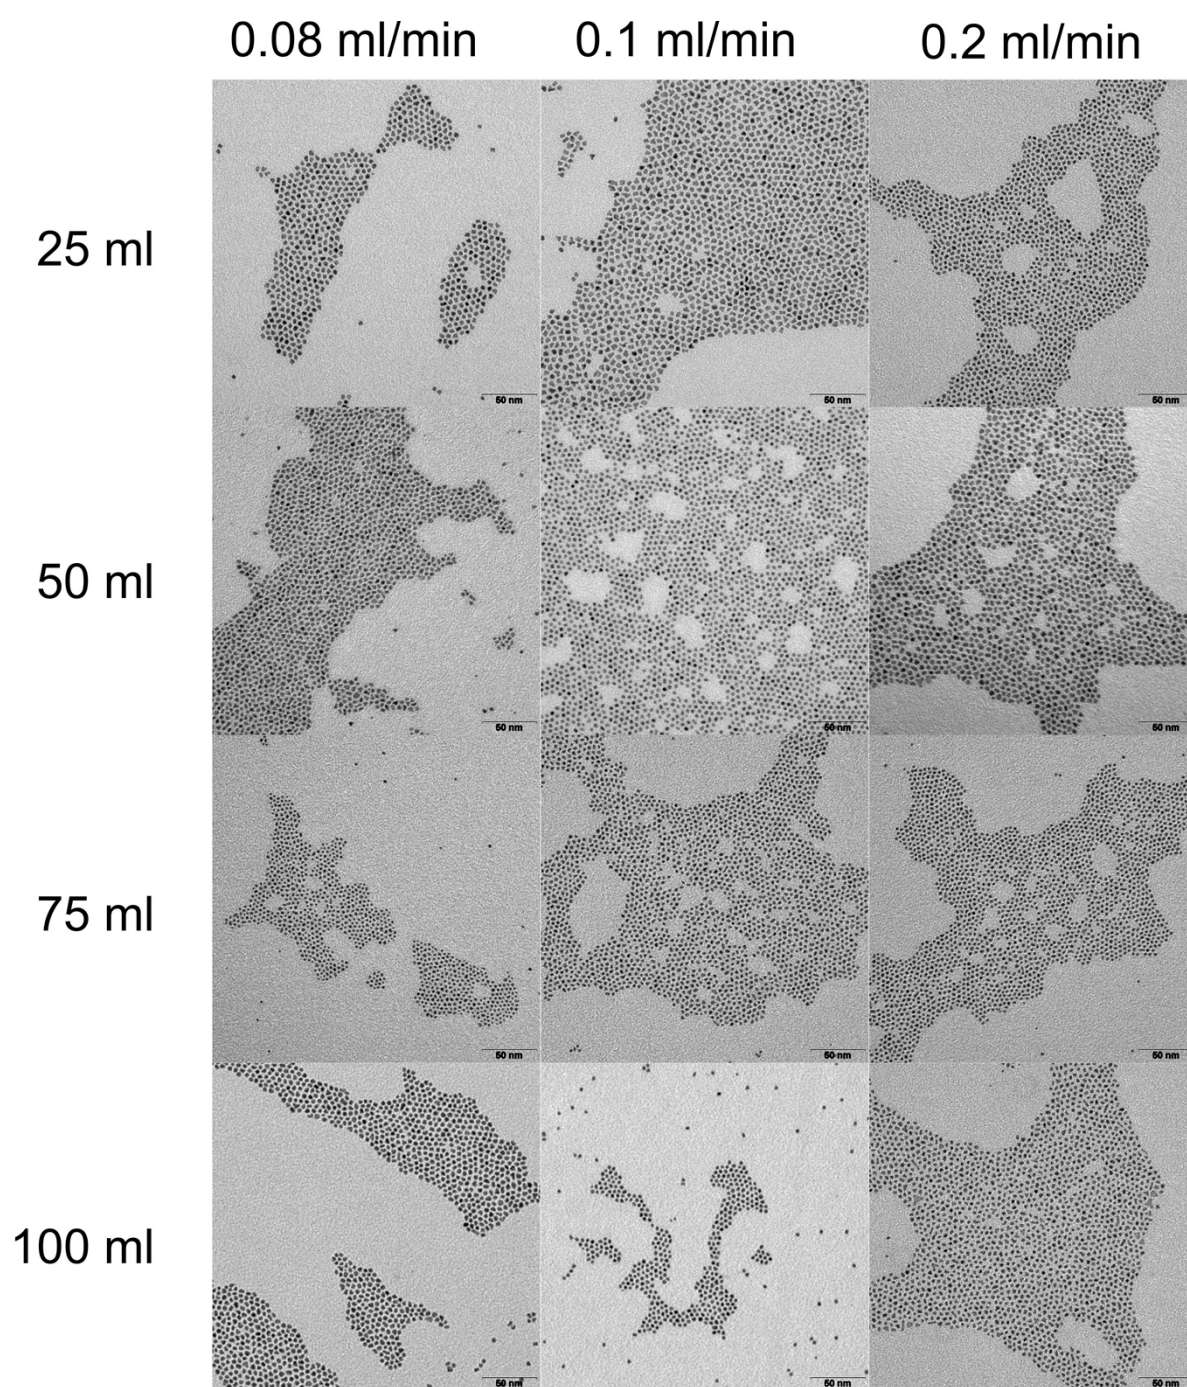

**Figure S1** TEM images of particles synthesized with different dilution of the seed particles (1:25, 1:50, 1:75 and 1:100) and injection rates varying between 0.08 ml/min and 0.2 ml/min
